# Supplementary material for: Meta-Analysis of Repository Data: Impact of Data Regularization on NIMH Schizophrenia Linkage Results
Source: PLOS journal article supplement (doi:10.1371/journal.pone.0084696), 2014-01-14
Supplement: S2 (10.1371/journal.pone.0084696.s002) [file journal.pone.0084696.s002]

## Phenotype Processing Algorithm

1. Each individual has three associated variables which will be used for diagnostic classification. The variables are SZ, SA, and BS, which correspond to affection status for Schizophrenia, Schizoaffective Disorder, and Broad Spectrum. Each variable can have the value 0 (phenotype unknown for that diagnosis), 1 (not affected with that diagnosis), or 2 (affected with that diagnosis).
2. Initialize all three variables = 1
3. If person has any code in the SZ\_CODES set, set SZ = 2
4. If person has any code in the SA\_CODES set, set SA = 2
5. If person has any code in the BS\_CODES set, set BS = 2
6. If person has no codes, set SZ=SA=BS = 0; done with this person
7. If person has any code in the GLOBAL\_EXCLUDE set, set SZ=SA=BS=0; done with this person
8. If SZ=SA=BS=1:
  - a. If person has any code in the UNAFF\_EXCLUDE set, set SZ=SA=BS=0
  - b. Done with this person
9. If SZ=2:
  - a. If person has any code in the SZ\_EXCLUDE set, set SZ=0
  - b. If person has any code in the SZ\_DEMOTE1 set, set SZ=0 and SA=2
  - c. If person has any code in the SZ\_DEMOTE2 set, set SZ=0, SA=0, and BS=2
10. If SA=2:
  - a. If person has any code in the SA\_EXCLUDE set, set SA=0
  - b. If person has any code in the SA\_DEMOTE set, set SA=0 and BS=2
11. If BS=2:
  - a. If person has any code in the BS\_EXCLUDE set, set BS=0
12. If SZ=2 AND SA=2, set SZ=0

Possible end states:

| SZ    | SA    | BS      | Classification  | Diagnosis | Affection  |
|-------|-------|---------|-----------------|-----------|------------|
| 2     | [0,1] | [0,1,2] | Schizophrenia   | 4         | Affected   |
| [0,1] | 2     | [0,1,2] | Schizoaffective | 3         | Affected   |
| [0,1] | [0,1] | 2       | Broad Spectrum  | 2         | Unknown    |
| 1     | 1     | 1       | Unaffected      | 1         | Unaffected |
| 0     | 0     | 0       | Unknown         | 0         | Unknown    |

DSMIIIR

[SZ\_CODES]

295.10 Schizophrenia, disorganized type, unspecified  
295.12 Schizophrenia, disorganized type, chronic  
295.22 Schizophrenia, catatonic type, chronic  
295.30 Schizophrenia, paranoid type, unspecified  
295.32 Schizophrenia, paranoid type, chronic  
295.60 Schizophrenia, residual type, unspecified  
295.62 Schizophrenia, residual type, chronic  
295.90 Schizophrenia, undifferentiated type, unspecified  
295.92 Schizophrenia, undifferentiated type, chronic  
295.34 Schizophrenia, paranoid type, chronic with acute exacerbation  
295.35 Schizophrenia, paranoid type, in remission

[SA\_CODES]

295.70 Schizoaffective disorder  
295.70D Schizoaffective disorder, depression type  
295.70M Schizoaffective disorder, manic type

[BS\_CODES]

295.40 Schizophreniform disorder  
297.10 Delusional disorder  
298.90 Psychotic disorder NOS  
301.00 Paranoid personality disorder  
301.20 Schizoid personality disorder  
301.22 Schizotypal personality disorder

[GLOBAL\_EXCLUDE]

60 Dx Unknown  
61 Un Dx Psychosis  
62 Un Dx Psychosis, w/ hospitalization  
63 Un Dx Psychiatric Disorder w/o hospitalization  
290.10 Presenile dementia NOS OR Primary degenerative dementia of the Alzheimer type, presenile onset, uncomplicated  
290.40 Multi-infarct dementia, uncomplicated  
291.20 Dementia associated with alcoholism  
292.12 Other or unspecified psychoactive substance hallucinosis  
293.00 Delirium (etiology noted on Axis III or is unknown)  
293.81 Organic delusional disorder (etiology noted on Axis III or is unknown)  
293.82 Organic hallucinosis (etiology noted on Axis III or is unknown)  
293.83 Organic mood disorder (etiology noted on Axis III or is unknown)

294.10 Dementia (etiology noted on Axis III or is unknown)  
296.20 Major depression, single episode, unspecified  
296.24 Major depression, single episode, with psychotic features  
296.30 Major depression, recurrent, unspecified  
296.34 Major depression, recurrent, with psychotic features  
296.40 Bipolar disorder, manic, unspecified  
296.44 Bipolar disorder, manic, with psychotic features  
296.60 Bipolar disorder, mixed, unspecified  
296.64 Bipolar disorder, mixed, with psychotic features  
299.80 Pervasive developmental disorder NOS  
300.90 Unspecified mental disorder (nonpsychotic)  
304.00 Opioid dependence  
304.10 Sedative, hypnotic, or anxiolytic dependence  
304.20 Cocaine dependence  
304.40 Amphetamine or similarly acting sympathomimetic dependence  
304.50 Hallucinogen dependence OR Phencyclidine (PCP) or similarly acting arylcyclohexylamine dependence  
304.60 Inhalant dependence  
304.90 Polysubstance dependence OR Psychoactive substance dependence NOS  
305.30 Hallucinogen abuse OR Hallucinogen hallucinosis  
305.40 Sedative, hypnotic, or anxiolytic abuse OR Sedative, hypnotic, or anxiolytic intoxication  
305.50 Opioid abuse OR Opioid intoxication  
305.60 Cocaine abuse OR Cocaine intoxication  
305.70 Amphetamine or similarly acting sympathomimetic abuse OR Amphetamine or similarly acting sympathomimetic intoxication  
310.10 Organic personality disorder (etiology noted on Axis III or is unknown)  
317.00 Mild mental retardation  
318.00 Moderate mental retardation  
319.00 Unspecified mental retardation  
555.00 Any other diagnosis  
290.00A Senile dementia NOS  
290.00B Primary degenerative dementia of the Alzheimer type, senile onset, uncomplicated  
292.00F Amphetamine or similarly acting sympathomimetic withdrawal  
292.11C Other or unspecified psychoactive substance delusional disorder  
292.11D Hallucinogen delusional disorder  
292.84A Hallucinogen mood disorder  
292.84B Other or unspecified psychoactive substance mood disorder  
294.80A Organic mental disorder NOS (etiology noted on Axis III or is unknown)  
296.24C Major depression, single episode, with psychotic features, mood congruent  
296.24I Major depression, single episode, with psychotic features, mood incongruent  
296.34C Major depression, recurrent, with psychotic features, mood congruent  
296.34I Major depression, recurrent, with psychotic features, mood incongruent  
296.44C Bipolar disorder, manic, with psychotic features, mood congruent  
296.44I Bipolar disorder, manic, with psychotic features, mood incongruent  
304.50A Hallucinogen dependence  
304.50B Phencyclidine (PCP) or similarly acting arylcyclohexylamine dependence

304.90A Polysubstance dependence  
304.90B Psychoactive substance dependence NOS  
305.30A Hallucinogen hallucinosis  
305.30B Hallucinogen Abuse/Dep.  
305.40A Sedative, hypnotic, or anxiolytic abuse  
305.50A Opioid abuse  
305.50B Opioid intoxication  
305.60A Cocaine abuse  
305.70B Amphetamine or similarly acting sympathomimetic abuse  
305.90A Phencyclidine (PCP) or similarly acting arlycyclohexylamine abuse  
305.90C Inhalant abuse  
305.90D Psychoactive substance abuse NOS  
305.90E Other or unspecified psychoactive substance intoxication  
305.90G Inhalant intoxication  
315.90A Development disorder NOS  
799.90B Diagnosis or condition deferred on Axis I  
V40.00 Borderline intellectual functioning

[UNAFF\_EXCLUDE]

296.89 Bipolar II Disorder  
296.90 Mood Disorder NOS  
301.90 Personality disorder NOS  
311.00 Depressive disorder NOS  
296.70A Bipolar disorder, NOS  
799.90A Diagnosis or condition deferred on Axis II

[SZ\_EXCLUDE]

[SZ\_DEMOT1]

296.31 Major depression, recurrent, mild  
296.32 Major depression, recurrent, moderate  
296.33 Major depression, recurrent, severe, without psychotic features  
296.35 Major depression, recurrent, in partial remission  
296.36 Major depression, recurrent, in full remission  
296.52 Bipolar disorder, depressed, moderate  
296.55 Bipolar disorder, depressed, in partial remission  
296.89 Bipolar II Disorder  
296.90 Mood Disorder NOS  
311.00 Depressive disorder NOS  
296.70A Bipolar disorder, NOS

[SZ\_DEMOTE2]

[SA\_EXCLUDE]

[SA\_DEMOTE]

[BS\_EXCLUDE]

DSMIV

[SZ\_CODES]

295.00 Schizophrenia, unspecified  
295.10 Schizophrenia, Disorganized Type  
295.20 Schizophrenia, Catatonic Type  
295.30 Schizophrenia, Paranoid Type  
295.60 Schizophrenia, Residual Type  
295.90 Schizophrenia, Undifferentiated Type  
295.92 Schizophrenia, undifferentiated type, chronic

[SA\_CODES]

295.70 Schizoaffective Disorder  
295.70D Schizoaffective disorder, depressive type  
295.70M Schizoaffective disorder, bipolar type

[BS\_CODES]

295.40 Schizophreniform Disorder  
298.8 Brief Psychotic Disorder  
298.9 Psychotic Disorder NOS  
301.0 Paranoid Personality Disorder  
301.20 Schizoid Personality Disorder  
301.22 Schizotypal Personality Disorder  
297.10/298 Delusional Disorder/Psychotic Disorder  
297.1 Delusional Disorder

[GLOBAL\_EXCLUDE]

290.0 Dementia of the Alzheimer's Type, With Late Onset, Uncomplicated (DSMIV)  
291.2 Alcohol-Induced Persisting Dementia  
291.3 Alcohol-Induced Psychotic Disorder, With Hallucinations  
291.5 Alcohol-Induced Psychotic Disorder, With Delusions  
291.9 Alcohol-Related Disorder NOS  
292.11 Amphetamine-Induced Psychotic Disorder, With Delusions OR Cannabis-Induced Psychotic Disorder, With Delusions OR Cocaine-Induced Psychotic Disorder, With Delusions OR Hallucinogen-Induced Psychotic Disorder, With Delusions OR Inhalant-Induced Psychotic Disorder, With Delusions OR Opioid-Induced Psychotic Disorder, With Delusions OR Other (or Unknown) Substance-Induced Psychotic Disorder, With Delusions OR Phencyclidine-Induced Psychotic Disorder, With Delusions OR Sedative-, Hypnotic-, or Anxiolytic-Induced Psychotic Disorder, With Delusions  
292.89 Amphetamine-Induced Anxiety Disorder OR Amphetamine-Induced Sexual Dysfunction OR Amphetamine-Induced Sleep Disorder OR Amphetamine Intoxication OR Caffeine-Induced Anxiety Disorder OR Caffeine-Induced Sleep Disorder OR Cannabis-Induced Anxiety Disorder OR Cannabis Intoxication OR Cocaine-Induced Anxiety Disorder OR Cocaine-Induced Sexual Dysfunction OR Cocaine-Induced Sleep Disorder OR Cocaine

Intoxication OR Hallucinogen-Induced Anxiety Disorder OR Hallucinogen Intoxication OR Hallucinogen Persisting Perception Disorder OR Inhalant-Induced Anxiety Disorder OR Inhalant Intoxication OR Opioid-Induced Sexual Dysfunction OR Opioid-Induced Sleep Disorder OR Opioid Intoxication OR Other (or Unknown) Substance-Induced Anxiety Disorder OR Other (or Unknown) Substance-Induced Sexual Dysfunction OR Other (or Unknown) Substance-Induced Sleep Disorder OR Other (or Unknown) Substance Intoxication OR Phencyclidine-Induced Anxiety Disorder OR Phencyclidine Intoxication OR Sedative-, Hypnotic-, or Anxiolytic-Induced Anxiety Disorder OR Sedative-, Hypnotic-, or Anxiolytic-Induced Sexual Dysfunction OR Sedative-, Hypnotic-, or Anxiolytic-Induced Sleep Disorder OR Sedative, Hypnotic, or Anxiolytic Intoxication

293.81 Psychotic Disorder Due to ... [Indicate the General Medical Condition], With Delusions

293.82 Psychotic Disorder Due to ... [Indicate the General Medical Condition], With Hallucinations

293.83 Mood Disorder Due to ... [Indicate the General Medical Condition]

293.9 Mental Disorder NOS Due to ... [Indicate the General Medical Condition]

294.1 Dementia Due to ... [Indicate the General Medical Condition] (DSMIV)

294.8 Amnestic Disorder NOS OR Dementia NOS

296.00 Bipolar I Disorder, Single Manic Episode, Unspecified

296.04 Bipolar I Disorder, Single Manic Episode, Severe With Psychotic Features

296.20 Major Depressive Disorder, Single Episode, Unspecified

296.24 Major Depressive Disorder, Single Episode, Severe With Psychotic Features

296.30 Major Depressive Disorder, Recurrent, Unspecified

296.34 Major Depressive Disorder, Recurrent, Severe With Psychotic Features

296.44 Bipolar I Disorder, Most Recent Episode Manic, Severe With Psychotic Features

296.54 Bipolar I Disorder, Most Recent Episode Depressed, Severe With Psychotic Features

296.60 Bipolar I Disorder, Most Recent Episode Mixed, Unspecified

296.64 Bipolar I Disorder, Most Recent Episode Mixed, Severe With Psychotic Features

296.7 Bipolar I Disorder, Most Recent Episode Unspecified

300.9 Unspecified Mental Disorder (nonpsychotic)

304.00 Opioid Dependence

304.10 Sedative, Hypnotic, or Anxiolytic Dependence

304.20 Cocaine Dependence

304.40 Amphetamine Dependence

304.50 Hallucinogen Dependence

304.60 Inhalant Dependence (DSMIV) OR Inhalant Dependence OR Phencyclidine Dependence (DSMIVTR)

304.80 Polysubstance Dependence

305.30 Hallucinogen Abuse

305.40 Sedative, Hypnotic, or Anxiolytic Abuse

305.50 Opioid Abuse

305.60 Cocaine Abuse

305.70 Amphetamine Abuse

305.90 Caffeine Intoxication OR Inhalant Abuse OR Other (or Unknown) Substance Abuse OR Phencyclidine Abuse

315.9 Learning Disorder NOS

317 Mild Mental Retardation

318.0 Moderate Mental Retardation

318.1 Severe Mental Retardation

319 Mental Retardation, Severity Unspecified

555.00 Any other diagnosis

799.9 Diagnosis Deferred on Axis II OR Diagnosis or Condition Deferred on Axis I  
290.10A Dementia due to Creutzfeldt-Jakob disease  
290.10C Dementia of the Alzheimer's type, with early onset, uncomplicated  
291.8B Alcohol-induced mood disorder  
292.11A Amphetamine-induced psychotic disorder, with delusions  
292.11G Other (or unknown) substance-induced psychotic disorder, with delusions  
292.12A Amphetamine-induced psychotic disorder, with hallucinations  
292.12B "Cannabis-induced psychotic disorder, with hallucinations"  
292.12C Cocaine-induced psychotic disorder, with hallucinations  
292.12G Other (or unknown) substance-induced psychotic disorder, with hallucinations  
292.84B Cocaine-induced mood disorder  
292.84F Other (or unknown) substance-induced mood disorder  
292.9I Other (or unknown) substance-related disorder NOS  
293.89B Catatonic disorder due to [Indicate the general medical condition]  
294.8B Dementia NOS  
294.9A Cognitive disorder NOS  
294.9B Dementia due to HIV disease  
296.34C Major Depressive Disorder, Recurrent, Severe With Psychotic Features, Mood Congruent  
296.34I Major Depressive Disorder, Recurrent, Severe With Psychotic Features, Mood Incongruent  
296.40A Bipolar I disorder, most recent episode hypomanic  
296.40B Bipolar I disorder, most recent episode manic, unspecified  
296.74C Bipolar I Disorder, Most Recent Episode Unspecified, Severe With Psychotic Features, Mood Congruent  
296.74I Bipolar I Disorder, Most Recent Episode Unspecified, Severe With Psychotic Features, Mood Incongruent  
299.80B Pervasive developmental disorder NOS  
304.90A Other (or unknown) substance dependence  
304.90B Phencyclidine dependence  
304.xx/305 Other (or Unknown) Substance Dependence/Alcohol Abuse  
305.90B Inhalant abuse  
305.90C Other (or unknown) substance abuse  
305.90D Phencyclidine abuse  
799.9B Diagnosis or condition deferred on Axis I  
V62.89 Borderline Intellectual Functioning OR Phase of Life Problem OR Religious or Spiritual Problem  
V62.89A Borderline intellectual functioning

[UNAFF\_EXCLUDE]

296.80 Bipolar Disorder NOS  
296.89 Bipolar II Disorder  
296.90 Mood Disorder NOS  
301.9 Personality Disorder NOS  
311 Depressive Disorder NOS  
799.9A Diagnosis deferred on Axis II



[SZ\_EXCLUDE]

[SZ\_DEMOTE1]

296.02 Bipolar I Disorder, Single Manic Episode, Moderate  
296.31 Major Depressive Disorder, Recurrent, Mild  
296.32 Major Depressive Disorder, Recurrent, Moderate  
296.33 Major Depressive Disorder, Recurrent, Severe Without Psychotic Features  
296.35 Major Depressive Disorder, Recurrent, In Partial Remission  
296.36 Major Depressive Disorder, Recurrent, In Full Remission  
296.41 Bipolar I Disorder, Most Recent Episode Manic, Mild  
296.46 Most Recent Episode Manic, In Full Remission  
296.52 Bipolar I Disorder, Most Recent Episode Depressed, Moderate  
296.55 Bipolar I Disorder, Most Recent Episode Depressed, In Partial Remission  
296.56 Bipolar I Disorder, Most Recent Episode Depressed, In Full Remission  
296.80 Bipolar Disorder NOS  
296.89 Bipolar II Disorder  
296.90 Mood Disorder NOS  
311 Depressive Disorder NOS

[SZ\_DEMOTE2]

[SA\_EXCLUDE]

[SA\_DEMOTE]

[BS\_EXCLUDE]
